# Supplementary material for: Metabolomics differences between silkworms (Bombyx mori) reared on fresh mulberry (Morus) leaves or artificial diets
Source: PubMed Central journal article supplement (PMC5591246; doi:10.1038/s41598-017-11592-4), 2017-09-08
Supplement: 41598_2017_11592_MOESM1_ESM.pdf [file 41598_2017_11592_MOESM1_ESM.pdf]

# Metabolomics differences between silkworms (*Bombyx mori*) reared on fresh mulberry (*Morus*) leaves or artificial diets

Hui-Ling Dong<sup>1,2</sup>, Sheng-Xiang Zhang<sup>3</sup>, Hui Tao<sup>1,2</sup>, Zhuo-Hua Chen<sup>1,2</sup>, Xue Li<sup>1,2</sup>, Jian-Feng Qiu<sup>1,2</sup>, Wen-Zhao Cui<sup>1,2</sup>, Yang-Hu Sima<sup>1,2,4</sup>, Wei-Zheng Cui<sup>3</sup>, Shi-Qing Xu<sup>1,2,4</sup>

<sup>1</sup>School of Biology and Basic Medical Sciences, Medical College, Soochow University, Suzhou 215123, China.

<sup>2</sup>Institute of Agricultural Biotechnology & Ecology (IABE), Soochow University, Suzhou 215123, China.

<sup>3</sup>College of Forestry, Shandong Agricultural University, Taian Shandong 271018, China. <sup>4</sup>National Engineering Laboratory for Modern Silk (NEAER), Soochow University, Suzhou 215123, China. H. -L. D. and S. -X. Z. contributed equally to this work. Correspondence and requests for materials should be addressed to S.-Q.X. (email: szsqxu@suda.edu.cn) or W.-Z. C. (email: wzcui88@163.com).

## Supplementary Information

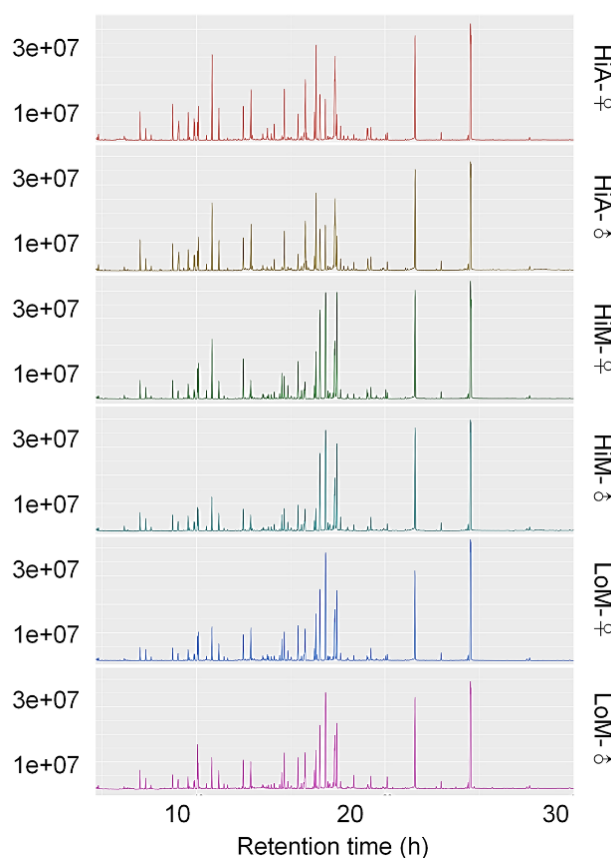

**Figure S1 Total ion current GC-MS chromatogram.** GC condition as: split injection with a split ratio of 20:1, injection volume 1  $\mu$ l, the inlet, ion source and interface temperatures are 280°C, 250°C and 150°C, respectively. Temperature programming were as follows: 70°C for 2 min, then rise 10°C per minute until 300°C and keep 300°C for 5 minutes. The total operating time was 30 min, the carrier gas was helium, and the carrier gas flow rate was 1 ml/min. MS condition as: electrospray ionization source, full scan mode, electron energy 70eV; quadrupole scan range 35 - 780 m/z.

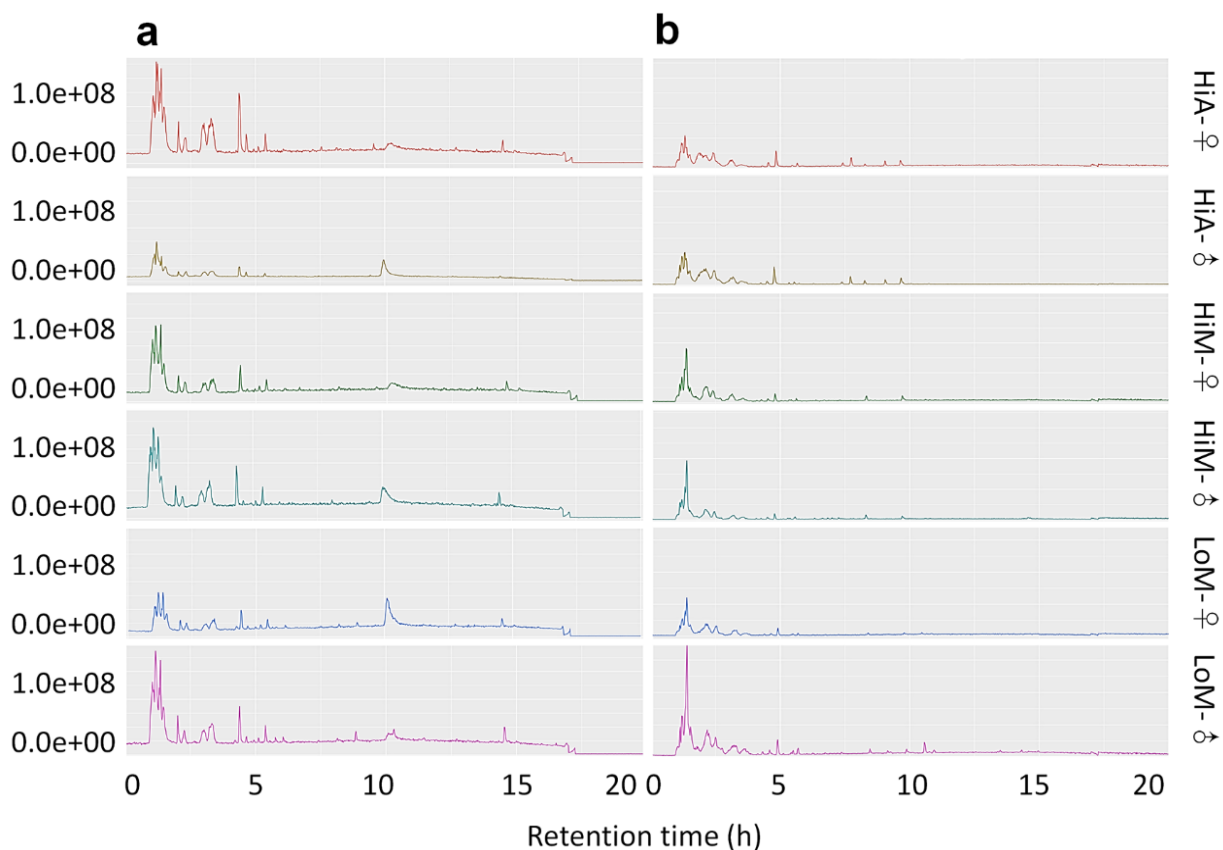

**Figure S2 Total ion current LC-MS chromatograms.** (a) Positive ion mode. (b) Negative ion mode. HPLC column temperature 35°C, injector temperature 8°C, injection volume 3  $\mu$ l. The mobile phase is ultrapure water (A) / acetonitrile (B) (contain v/v = 0.1% formic acid). Flow rate 0.3 ml/min, linear gradient elution (0 - 1min, 2% B; 1 - 11min, 2% - 50% B; 11 - 17min, 50% - 98% B; 17 -18 min, 98%; 18 - 19min, 98% - 2% B; 19 - 20min, 2% B). Leucine enkephalin as lock and spray (0.4 ng/L, 0.1% formic acid CAN/H<sub>2</sub>O=50/50). MS condition: mode capillary ionization voltage were 4.8 kV and 4.5 kV, respectively, Sheath gas 45, auxiliary gas 10, capillary temperature 325°C, scanning range positive ion 89 - 1000 m / z, negative ion 87 - 1000 m/z.

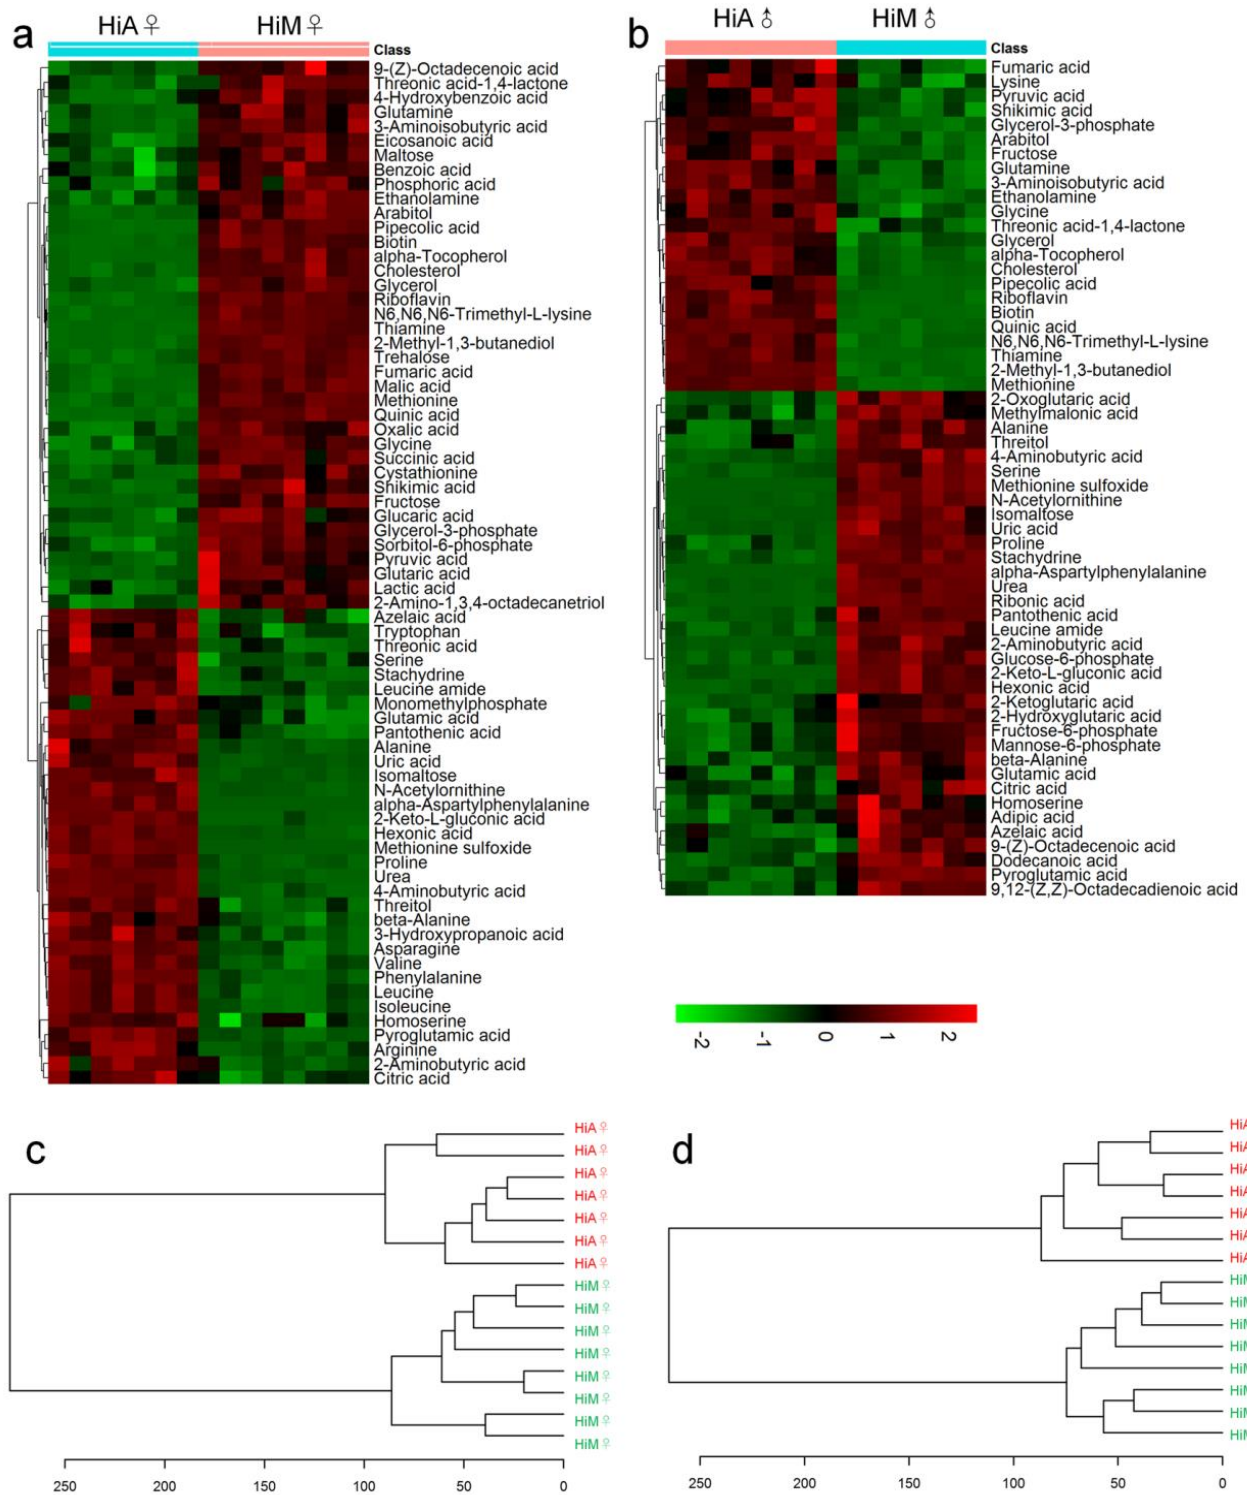

**Figure S3 Differences metabolites heat map analysis (a & b) and cluster analysis (c & d).** (a) and (c) are shown female, (b) and (d) represents the male. Heat map showing shades of metabolites in each group in an amount of height, the higher the amount of red, green represents the lower amount. Tree clustering was based on Euclidean clustering and the greatest distance method.

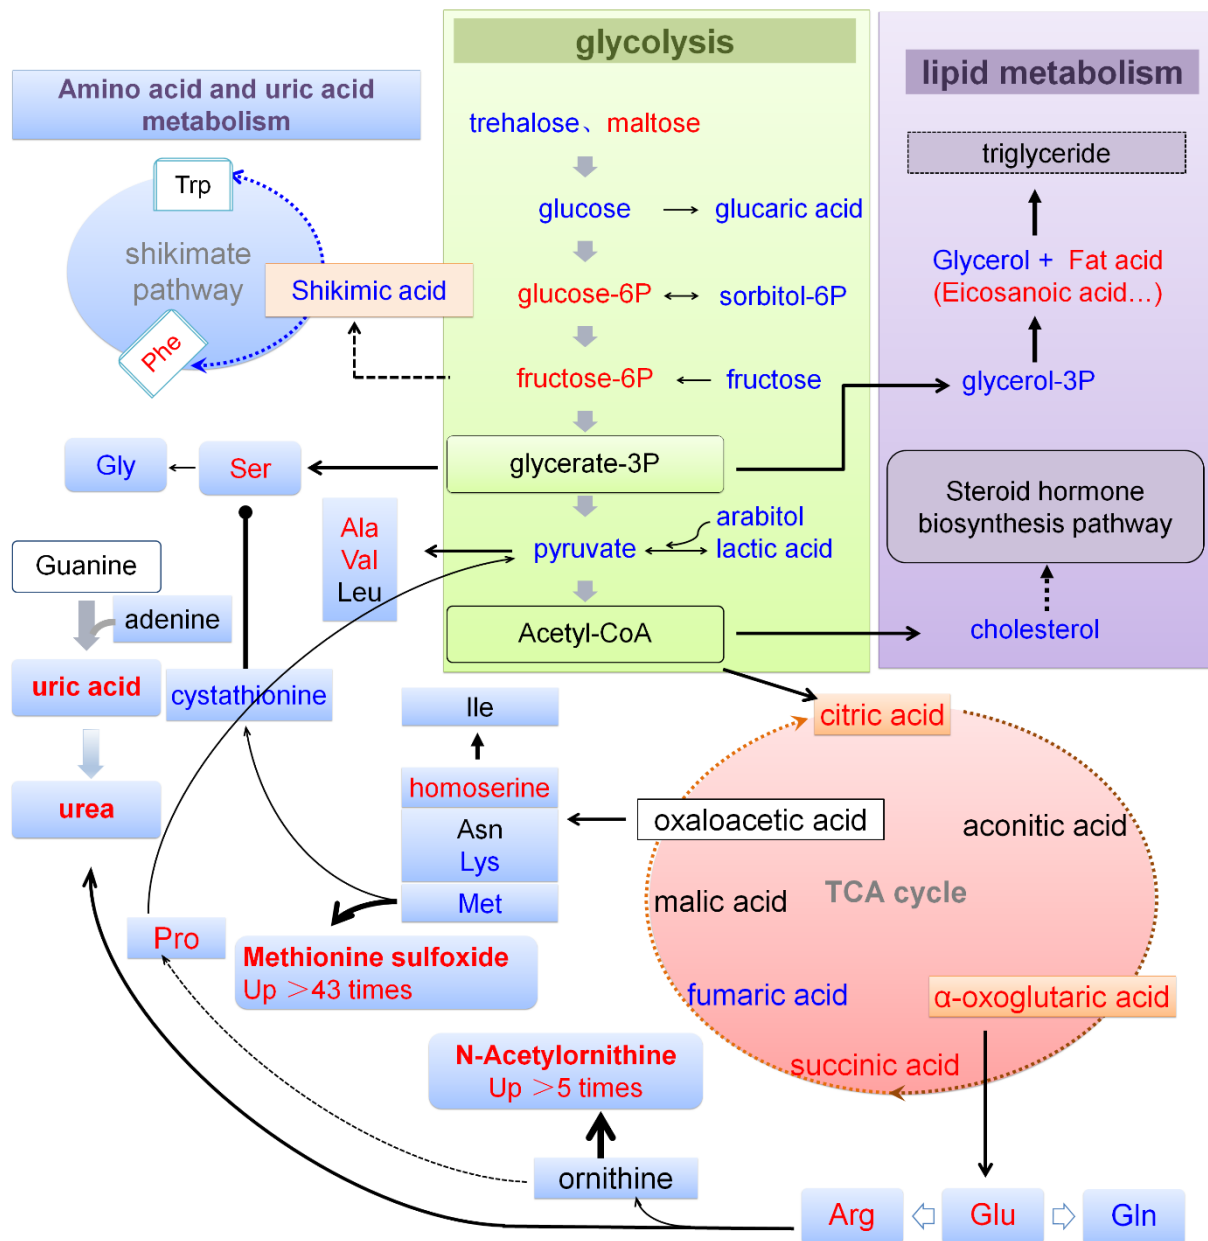

**Figure S4 Summary of the primarily affected metabolic pathways in the hemolymph of male silkworms reared on the artificial diet.** The pathways were simplified and organized based on Kyoto Encyclopedia of Genes and Genomes pathways (<http://www.kegg.jp/>). The data were collected from the metabolomic data of male larvae of the high feed intake strain reared on the artificial diet (HiA males). The font color represents the level of change in the silkworms reared on the artificial diet compared with that of the silkworms of the same strain reared on fresh mulberry leaves (HiM males); red indicates a higher level; blue indicates a lower level; and black indicates no significant change. Black font with a black frame indicates an unidentified metabolite.

| Classification          | Metabolites                 | Mz    | Rt (mins) | Mean   |        |        |        |        |        |
|-------------------------|-----------------------------|-------|-----------|--------|--------|--------|--------|--------|--------|
|                         |                             |       |           | HiM♀   | HiM♂   | LoM♀   | LoM♂   | HiA♀   | HiA♂   |
| <b>Amine</b>            | Ethanolamine                | 174.1 | 9.5       | 0.90   | 1.28   | 0.98   | 1.06   | 0.67   | 0.92   |
|                         | Leucine amide               | 3.0   | 131.1     | 0.15   | 0.10   | 0.23   | 0.17   | 0.38   | 0.55   |
| <b>amino acid</b>       | Alanine                     | 116.1 | 7.0       | 52.67  | 55.61  | 50.26  | 61.89  | 63.50  | 76.32  |
|                         | 2-Aminobutyric acid         | 130.1 | 8.1       | 0.72   | 1.24   | 0.78   | 2.22   | 0.97   | 2.83   |
|                         | Valine                      | 144.1 | 8.8       | 50.49  | 52.67  | 41.58  | 47.16  | 70.88  | 57.17  |
|                         | Leucine                     | 158.1 | 9.6       | 45.01  | 53.60  | 38.98  | 42.77  | 63.66  | 50.23  |
|                         | Isoleucine                  | 158.1 | 9.9       | 24.20  | 28.78  | 20.84  | 22.31  | 39.97  | 28.94  |
|                         | Proline                     | 142.1 | 9.9       | 25.73  | 29.85  | 27.50  | 33.82  | 48.88  | 50.98  |
|                         | Glycine                     | 174.1 | 10.1      | 75.43  | 65.76  | 80.41  | 81.96  | 42.93  | 46.73  |
|                         | Homoserine                  | 103.0 | 10.7      | 0.02   | 0.02   | 0.02   | 0.02   | 0.03   | 0.04   |
|                         | Serine                      | 204.2 | 10.8      | 100.97 | 75.42  | 80.53  | 55.55  | 123.92 | 125.06 |
|                         | beta-Alanine                | 248.1 | 11.7      | 1.35   | 1.64   | 4.21   | 5.48   | 1.83   | 2.50   |
|                         | Methionine                  | 176.1 | 12.8      | 9.42   | 7.24   | 6.91   | 6.20   | 3.46   | 3.17   |
|                         | Pyroglutamic acid           | 156.1 | 12.9      | 58.01  | 67.59  | 110.16 | 109.73 | 126.96 | 126.63 |
|                         | Hydroxyproline              | 140.1 | 13.0      | 0.97   | 1.10   | 0.94   | 1.00   | 0.97   | 1.21   |
|                         | 4-Aminobutyric acid         | 175.1 | 13.0      | 0.30   | 0.32   | 0.34   | 0.34   | 0.77   | 0.87   |
|                         | Glutamic acid               | 246.1 | 14.0      | 1.36   | 1.38   | 1.98   | 1.31   | 2.41   | 2.12   |
|                         | Phenylalanine               | 192.1 | 14.1      | 8.70   | 9.18   | 6.74   | 7.31   | 14.34  | 10.71  |
|                         | Asparagine                  | 116.1 | 14.7      | 21.19  | 30.10  | 33.13  | 47.44  | 35.72  | 30.92  |
|                         | Lysine                      | 174.1 | 17.3      | 36.28  | 35.78  | 37.71  | 36.04  | 32.70  | 28.91  |
|                         | Prolinamide                 | 1.2   | 147.1     | 26.77  | 25.19  | 34.35  | 22.39  | 28.60  | 26.49  |
|                         | N6,N6,N6-Trimethyl-L-lysine | 1.2   | 189.2     | 112.27 | 108.16 | 125.49 | 86.35  | 33.94  | 38.66  |
|                         | Histidine                   | 1.2   | 156.1     | 125.71 | 125.00 | 148.97 | 111.38 | 117.18 | 134.22 |
|                         | Arginine                    | 1.2   | 173.1     | 0.24   | 0.31   | 0.20   | 0.37   | 0.58   | 0.50   |
|                         | Threonine                   | 1.3   | 120.1     | 21.47  | 24.23  | 28.56  | 21.00  | 22.32  | 25.65  |
|                         | N3,N4-Dimethyl-L-arginine   | 1.3   | 203.6     | 0.73   | 0.63   | 0.83   | 0.63   | 0.63   | 0.78   |
|                         | 2-Aminoadipic acid          | 1.4   | 162.1     | 2.15   | 2.64   | 3.45   | 3.55   | 2.12   | 2.47   |
|                         | N-Acetylmethionine          | 1.4   | 175.1     | 4.75   | 5.14   | 6.54   | 5.13   | 19.59  | 26.68  |
|                         | 4-Oxoproline                | 2.6   | 128.0     | 2.37   | 2.52   | 2.42   | 2.62   | 0.25   | 7.85   |
| Glutamine               | 3.5                         | 145.1 | 2.98      | 2.53   | 0.04   | 0.12   | 0.85   | 0.56   |        |
| 3-Aminoisobutyric acid  | 3.5                         | 102.1 | 0.80      | 1.14   | 0.00   | 0.00   | 0.15   | 0.13   |        |
| Tryptophan              | 5.7                         | 205.1 | 39.09     | 49.82  | 52.86  | 40.09  | 49.10  | 48.60  |        |
| α-Aspartylphenylalanine | 5.9                         | 281.1 | 0.08      | 0.10   | 0.15   | 0.14   | 2.91   | 3.93   |        |
| <b>fatty acid</b>       | Dodecanoic acid             | 117.0 | 14.3      | 0.07   | 0.06   | 0.05   | 0.06   | 0.08   | 0.11   |
|                         | Tetradecanoic acid          | 132.0 | 16.4      | 0.04   | 0.04   | 0.03   | 0.03   | 0.04   | 0.06   |
|                         | Hexanoic acid               | 217.1 | 18.2      | 0.19   | 0.21   | 0.16   | 0.17   | 0.47   | 0.49   |
|                         | Hexadecanoic acid           | 117.0 | 18.3      | 4.12   | 5.85   | 4.99   | 5.39   | 3.68   | 6.83   |
|                         | Heptadecanoic acid          | 117.0 | 19.2      | 9.53   | 11.63  | 10.56  | 9.44   | 7.79   | 11.37  |
|                         | Octadecanoic acid           | 117.0 | 20.1      | 3.08   | 4.33   | 3.65   | 3.88   | 2.68   | 5.75   |
|                         | Eicosanoic acid             | 117.0 | 21.8      | 0.13   | 0.18   | 0.11   | 0.14   | 0.10   | 0.22   |
| <b>nucleotides</b>      | Uracil                      | 241.1 | 10.5      | 0.60   | 0.60   | 0.43   | 0.59   | 0.50   | 0.75   |
|                         | Thymine                     | 255.1 | 11.3      | 0.05   | 0.07   | 0.05   | 0.06   | 0.06   | 0.07   |
|                         | Adenine                     | 2.1   | 136.1     | 0.15   | 0.24   | 0.14   | 0.10   | 0.11   | 0.29   |
| <b>organic acid</b>     | 7-Methylguanine             | 2.7   | 166.1     | 0.35   | 0.38   | 0.43   | 0.31   | 0.31   | 0.35   |
|                         | Pyruvic acid                | 174.0 | 6.2       | 6.22   | 7.95   | 3.53   | 4.15   | 3.84   | 5.42   |
|                         | Lactic acid                 | 117.1 | 6.4       | 1.33   | 1.53   | 1.14   | 1.04   | 0.92   | 1.30   |
|                         | Glycolic acid               | 66.0  | 6.6       | 0.04   | 0.05   | 0.03   | 0.05   | 0.05   | 0.05   |
|                         | Oxalic acid                 | 66.0  | 7.5       | 0.02   | 0.03   | 0.02   | 0.04   | 0.01   | 0.03   |
|                         | 3-Hydroxypropanoic acid     | 177.1 | 7.6       | 0.13   | 0.24   | 0.13   | 0.43   | 0.19   | 0.31   |
|                         | Malonic acid                | 45.0  | 8.5       | 0.04   | 0.05   | 0.04   | 0.03   | 0.03   | 0.04   |
|                         | Benzoic acid                | 179.0 | 9.1       | 0.02   | 0.03   | 0.01   | 0.02   | 0.01   | 0.02   |
|                         | Maleic acid                 | 245.1 | 10.0      | 0.07   | 0.08   | 0.05   | 0.05   | 0.05   | 0.07   |
|                         | Succinic acid               | 247.1 | 10.1      | 15.44  | 10.78  | 16.47  | 11.37  | 11.43  | 12.17  |
|                         | Glyceric acid               | 292.1 | 10.4      | 0.14   | 0.15   | 0.14   | 0.14   | 0.16   | 0.16   |
|                         | Fumaric acid                | 245.1 | 10.5      | 17.23  | 13.09  | 10.58  | 13.05  | 8.43   | 10.10  |
|                         | Itaconic acid               | 43.1  | 10.6      | 0.20   | 0.16   | 0.11   | 0.12   | 0.10   | 0.18   |
|                         | Pipecolic acid              | 156.1 | 10.8      | 4.30   | 6.71   | 6.18   | 6.40   | 0.75   | 0.88   |
|                         | Glutaric acid               | 55.0  | 11.3      | 0.18   | 0.20   | 0.16   | 0.20   | 0.11   | 0.18   |
|                         | Malic acid                  | 233.1 | 12.5      | 20.39  | 14.89  | 15.02  | 16.78  | 13.71  | 14.19  |
|                         | Adipic acid                 | 111.0 | 12.6      | 0.17   | 0.16   | 0.14   | 0.16   | 0.14   | 0.22   |
|                         | Tetronic acid               | 292.1 | 13.4      | 0.78   | 0.76   | 0.72   | 0.75   | 0.76   | 0.77   |
|                         | 2-Hydroxyglutaric acid      | 203.1 | 13.5      | 0.36   | 0.28   | 0.45   | 0.49   | 0.37   | 0.41   |
|                         | 2-Ketoglutaric acid         | 198.0 | 13.5      | 1.63   | 0.88   | 1.32   | 1.08   | 1.52   | 1.52   |
|                         | 4-Hydroxybenzoic acid       | 223.1 | 14.1      | 0.04   | 0.03   | 0.04   | 0.03   | 0.02   | 0.02   |
| Aconitic acid           | 375.1                       | 15.5  | 0.38      | 0.25   | 0.28   | 0.32   | 0.06   | 0.13   |        |
| Ribonic acid            | 333.2                       | 15.8  | 0.50      | 0.03   | 0.05   | 0.05   | 0.88   | 1.28   |        |

|                        |                                 |       |       |        |        |        |        |        |        |
|------------------------|---------------------------------|-------|-------|--------|--------|--------|--------|--------|--------|
|                        | Azelaic acid                    | 55.1  | 15.9  | 0.03   | 0.06   | 0.04   | 0.05   | 0.05   | 0.11   |
|                        | 2-Keto-L-gluconic acid          | 292.1 | 15.9  | 0.02   | 0.02   | 0.05   | 0.01   | 0.60   | 0.59   |
|                        | Shikimic acid                   | 204.1 | 16.2  | 0.51   | 0.53   | 0.43   | 0.56   | 0.32   | 0.41   |
|                        | Quinic acid                     | 345.3 | 16.8  | 237.53 | 255.64 | 232.37 | 215.71 | 49.46  | 70.60  |
|                        | Glucaric acid                   | 333.1 | 18.4  | 0.25   | 0.26   | 0.25   | 0.28   | 0.21   | 0.23   |
|                        | 9,12-(Z,Z)-Octadecadienoic acid | 81.1  | 19.9  | 0.08   | 0.16   | 0.08   | 0.14   | 0.20   | 0.59   |
|                        | 9-(Z)-Octadecenoic acid         | 117.0 | 19.9  | 0.62   | 0.91   | 0.63   | 0.65   | 0.48   | 1.35   |
|                        | Urocanic acid                   | 1.2   | 137.0 | 0.15   | 0.30   | 0.19   | 0.11   | 0.13   | 0.20   |
|                        | Gluconic acid                   | 1.3   | 195.1 | 13.55  | 18.00  | 14.92  | 16.24  | 14.37  | 14.12  |
|                        | Threonic acid                   | 1.3   | 135.0 | 0.62   | 0.59   | 0.60   | 0.85   | 1.44   | 1.63   |
|                        | 2-Oxoglutaric acid              | 1.6   | 145.0 | 30.94  | 14.54  | 23.48  | 39.46  | 34.13  | 30.24  |
|                        | Glutaconic acid                 | 2.2   | 111.0 | 51.21  | 66.70  | 53.82  | 40.93  | 69.26  | 74.92  |
|                        | alpha-Hydroxyglutaric acid      | 2.2   | 147.0 | 2.21   | 3.15   | 2.81   | 3.83   | 1.95   | 2.72   |
|                        | Uric acid                       | 2.4   | 167.0 | 0.32   | 0.74   | 1.08   | 3.34   | 3.72   | 5.28   |
|                        | Citric acid                     | 2.5   | 191.0 | 129.67 | 85.52  | 106.21 | 141.91 | 180.79 | 125.11 |
|                        | Methylmalonic acid              | 3.2   | 117.0 | 122.33 | 74.22  | 96.14  | 152.85 | 151.91 | 110.44 |
| <b>Vitamins</b>        | Pantothenic acid                | 103.1 | 18.0  | 1.56   | 1.48   | 1.31   | 1.37   | 2.19   | 2.38   |
|                        | gamma-Tocopherol                | 223.1 | 26.0  | 0.14   | 0.15   | 0.15   | 0.14   | 0.11   | 0.19   |
|                        | alpha-Tocopherol                | 237.1 | 27.3  | 0.34   | 0.39   | 0.27   | 0.25   | 0.05   | 0.09   |
|                        | Thiamine                        | 1.3   | 265.1 | 2.58   | 3.02   | 3.20   | 2.87   | 0.10   | 0.12   |
|                        | Riboflavin                      | 6.8   | 377.1 | 1.96   | 2.47   | 2.11   | 1.78   | 0.47   | 0.69   |
|                        | Biotin                          | 7.0   | 245.1 | 0.53   | 0.62   | 0.72   | 0.50   | 0.06   | 0.06   |
|                        | Nicotinic acid                  | 180.0 | 10.2  | 0.02   | 0.02   | 0.03   | 0.03   | 0.02   | 0.02   |
| <b>others</b>          | Urea                            | 189.1 | 9.0   | 14.56  | 18.46  | 13.71  | 18.85  | 37.30  | 44.97  |
|                        | 1,3-Di-tert-butylbenzene        | 175.1 | 9.3   | 0.28   | 0.37   | 0.32   | 0.28   | 0.24   | 0.33   |
|                        | Threonic acid-1,4-lactone       | 45.0  | 11.0  | 0.19   | 0.21   | 0.18   | 0.23   | 0.14   | 0.16   |
|                        | Succinic anhydride              | 201.1 | 12.8  | 0.06   | 0.04   | 0.05   | 0.04   | 0.04   | 0.05   |
|                        | beta-Sitosterol                 | 129.1 | 29.8  | 0.48   | 0.55   | 0.63   | 0.56   | 0.41   | 0.50   |
|                        | Choline                         | 1.2   | 104.1 | 57.85  | 70.20  | 63.08  | 55.93  | 65.23  | 80.51  |
|                        | Cholesterol                     | 129.1 | 27.5  | 0.92   | 1.30   | 1.46   | 1.15   | 0.35   | 0.37   |
|                        | Cystathionine                   | 1.2   | 221.1 | 3.46   | 0.41   | 2.16   | 0.11   | 0.64   | 0.13   |
|                        | Methionine sulfoxide            | 1.3   | 166.1 | 0.25   | 0.22   | 0.31   | 0.26   | 8.03   | 9.65   |
|                        | Stachydrine                     | 1.4   | 144.1 | 2.19   | 1.96   | 1.26   | 1.07   | 4.14   | 5.71   |
|                        | Succinic semialdehyde           | 1.6   | 101.0 | 0.71   | 1.31   | 0.58   | 2.51   | 0.07   | 0.27   |
|                        | Sepiapterin                     | 2.5   | 238.1 | 6.44   | 5.86   | 6.55   | 4.85   | 6.24   | 5.99   |
|                        | Esculin                         | 5.7   | 339.1 | 0.07   | 0.18   | 0.07   | 0.09   | 0.07   | 0.05   |
|                        | Betaine                         | 8.3   | 118.1 | 21.21  | 29.04  | 20.52  | 15.85  | 28.88  | 35.89  |
|                        | N,N'-Diphenylthiourea           | 12.9  | 229.2 | 0.14   | 0.15   | 0.15   | 0.09   | 0.09   | 0.15   |
| <b>phosphoric acid</b> | Monomethylphosphate             | 241.0 | 8.2   | 0.09   | 0.09   | 0.07   | 0.08   | 0.12   | 0.12   |
|                        | Phosphoric acid                 | 299.1 | 9.6   | 6.49   | 6.06   | 6.17   | 5.63   | 5.83   | 6.34   |
|                        | Glycerol-3-phosphate            | 299.1 | 15.7  | 8.20   | 9.02   | 6.42   | 7.51   | 3.44   | 5.23   |
|                        | Fructose-6-phosphate            | 315.1 | 21.1  | 1.88   | 1.43   | 0.93   | 1.17   | 1.11   | 2.41   |
|                        | Mannose-6-phosphate             | 387.2 | 21.1  | 0.93   | 0.64   | 0.46   | 0.54   | 0.51   | 1.06   |
|                        | Glucose-6-phosphate             | 387.2 | 21.2  | 1.51   | 0.49   | 0.38   | 0.47   | 0.45   | 1.14   |
|                        | Sorbitol-6-phosphate            | 299.1 | 21.5  | 1.48   | 1.51   | 1.00   | 1.04   | 0.78   | 1.23   |
| <b>polyol</b>          | Glycerol                        | 205.1 | 9.6   | 1.13   | 1.39   | 1.11   | 1.21   | 0.66   | 0.82   |
|                        | 2-Methyl-1,3-butanediol         | 117.0 | 11.0  | 0.23   | 0.24   | 0.17   | 0.20   | 0.06   | 0.09   |
|                        | Threitol                        | 217.1 | 12.8  | 0.12   | 0.13   | 0.09   | 0.10   | 0.28   | 0.30   |
|                        | Arabitol                        | 217.1 | 15.2  | 1.50   | 1.27   | 1.04   | 1.12   | 0.86   | 0.65   |
|                        | Ribitol                         | 319.2 | 15.4  | 0.21   | 0.20   | 0.37   | 0.27   | 0.26   | 0.25   |
|                        | Sorbitol                        | 319.2 | 17.6  | 11.64  | 12.63  | 9.17   | 8.63   | 10.31  | 10.63  |
|                        | myo-Inositol                    | 217.1 | 19.1  | 8.09   | 4.58   | 4.81   | 4.00   | 12.01  | 7.08   |
|                        | 1-Monohexadecanoylglycerol      | 371.3 | 23.0  | 10.72  | 13.46  | 12.65  | 10.53  | 9.01   | 14.26  |
|                        | Pyrogallol                      | 3.5   | 125.0 | 0.16   | 0.51   | 0.27   | 0.39   | 0.20   | 0.76   |
|                        | 2-Amino-1,3,4-octadecanetriol   | 12.9  | 318.3 | 1.54   | 1.92   | 1.67   | 1.21   | 1.06   | 1.66   |
|                        | 2-Amino-1,3-octadecanediol      | 14.0  | 302.3 | 1.87   | 2.27   | 2.08   | 1.29   | 1.36   | 2.25   |
| <b>sugar</b>           | Fructose                        | 103.1 | 17.0  | 6.46   | 6.64   | 4.69   | 6.31   | 2.54   | 2.86   |
|                        | Galactose                       | 133.0 | 17.2  | 0.85   | 0.08   | 0.21   | 0.06   | 0.12   | 0.11   |
|                        | Glucose                         | 103.0 | 17.3  | 1.53   | 0.77   | 0.78   | 0.83   | 0.36   | 0.50   |
|                        | Trehalose                       | 361.2 | 24.1  | 0.33   | 0.29   | 0.27   | 0.26   | 0.19   | 0.26   |
|                        | Maltose                         | 361.2 | 24.4  | 0.11   | 0.10   | 0.10   | 0.08   | 0.07   | 0.10   |
|                        | Gentiobiose                     | 362.1 | 25.0  | 0.10   | 0.07   | 0.06   | 0.06   | 0.06   | 0.07   |
|                        | Isomaltose                      | 361.2 | 25.6  | 0.08   | 0.05   | 0.05   | 0.03   | 0.47   | 0.37   |
|                        | Sucrose                         | 1.3   | 387.1 | 47.76  | 47.05  | 41.89  | 34.16  | 47.20  | 55.02  |

**Table S1 Differences in the metabolites examined by LC/GC-MS.** Mz, quantitative ion of metabolites. Rt (mins), retention time (minutes). Mean, Repeat measurement of biological samples are averaged.

| Metabolites                     | Mz    | Rt (mins) | Mean   |           | S.D.  |           | VIP  | pvalue | qvalue | log <sub>2</sub> FC |
|---------------------------------|-------|-----------|--------|-----------|-------|-----------|------|--------|--------|---------------------|
|                                 |       |           | HiA♀   | HiM♀+LoM♀ | HiA♀  | HiM♀+LoM♀ |      |        |        |                     |
| Thiamine                        | 265.1 | 1.3       | 0.10   | 2.89      | 0.01  | 0.37      | 1.45 | 0.00   | 0.00   | -4.79               |
| Biotin                          | 245.1 | 7.0       | 0.06   | 0.62      | 0.01  | 0.13      | 1.38 | 0.00   | 0.00   | -3.38               |
| Pipecolic acid                  | 156.1 | 10.8      | 0.75   | 5.24      | 0.12  | 1.16      | 1.35 | 0.00   | 0.00   | -2.80               |
| alpha-Tocopherol                | 237.1 | 27.3      | 0.05   | 0.31      | 0.00  | 0.06      | 1.35 | 0.00   | 0.00   | -2.52               |
| Quinic acid                     | 345.3 | 16.8      | 49.46  | 234.95    | 4.82  | 17.11     | 1.47 | 0.00   | 0.00   | -2.25               |
| Cystathionine                   | 221.1 | 1.2       | 0.64   | 2.81      | 0.23  | 0.93      | 1.18 | 0.00   | 0.00   | -2.13               |
| Riboflavin                      | 377.1 | 6.8       | 0.47   | 2.03      | 0.06  | 0.22      | 1.44 | 0.00   | 0.00   | -2.10               |
| N6,N6,N6-Trimethyl-L-lysine     | 189.2 | 1.2       | 33.94  | 118.88    | 2.37  | 10.35     | 1.45 | 0.00   | 0.00   | -1.81               |
| Cholesterol                     | 129.1 | 27.5      | 0.35   | 1.19      | 0.04  | 0.33      | 1.23 | 0.00   | 0.00   | -1.76               |
| 2-Methyl-1,3-butanediol         | 117.0 | 11.0      | 0.06   | 0.20      | 0.01  | 0.03      | 1.36 | 0.00   | 0.00   | -1.69               |
| Methionine                      | 176.1 | 12.8      | 3.46   | 8.16      | 0.35  | 1.39      | 1.32 | 0.00   | 0.00   | -1.24               |
| Oxalic acid                     | 66.0  | 7.5       | 0.01   | 0.02      | 0.00  | 0.00      | 1.30 | 0.00   | 0.00   | -1.21               |
| Fructose                        | 103.1 | 17.0      | 2.54   | 5.58      | 0.11  | 1.13      | 1.24 | 0.00   | 0.00   | -1.13               |
| Glycerol-3-phosphate            | 299.1 | 15.7      | 3.44   | 7.31      | 0.28  | 1.28      | 1.28 | 0.00   | 0.00   | -1.09               |
| 4-Hydroxybenzoic acid           | 223.1 | 14.1      | 0.02   | 0.04      | 0.00  | 0.00      | 1.33 | 0.00   | 0.00   | -0.96               |
| Glycine                         | 174.1 | 10.1      | 42.93  | 77.92     | 6.96  | 8.40      | 1.34 | 0.00   | 0.00   | -0.86               |
| Glycerol                        | 205.1 | 9.6       | 0.66   | 1.12      | 0.04  | 0.07      | 1.42 | 0.00   | 0.00   | -0.76               |
| N,N-Diphenylthiourea            | 229.2 | 12.9      | 0.09   | 0.15      | 0.02  | 0.03      | 1.05 | 0.00   | 0.01   | -0.66               |
| Glutaric acid                   | 55.0  | 11.3      | 0.11   | 0.17      | 0.00  | 0.02      | 1.24 | 0.00   | 0.00   | -0.64               |
| Trehalose                       | 361.2 | 24.1      | 0.19   | 0.30      | 0.01  | 0.03      | 1.30 | 0.00   | 0.00   | -0.61               |
| 2-Amino-1,3,4-octadecanetriol   | 318.3 | 12.9      | 1.06   | 1.60      | 0.10  | 0.24      | 1.16 | 0.00   | 0.00   | -0.60               |
| 2-Amino-1,3-octadecanediol      | 302.3 | 14.0      | 1.36   | 1.97      | 0.25  | 0.30      | 1.07 | 0.00   | 0.01   | -0.54               |
| Shikimic acid                   | 204.1 | 16.2      | 0.32   | 0.47      | 0.02  | 0.07      | 1.13 | 0.00   | 0.00   | -0.53               |
| Ethanolamine                    | 174.1 | 9.5       | 0.67   | 0.94      | 0.04  | 0.08      | 1.30 | 0.00   | 0.00   | -0.48               |
| Succinic acid                   | 247.1 | 10.1      | 11.43  | 15.95     | 0.60  | 2.14      | 1.14 | 0.00   | 0.00   | -0.48               |
| Maltose                         | 361.2 | 24.4      | 0.07   | 0.10      | 0.01  | 0.01      | 1.12 | 0.00   | 0.00   | -0.45               |
| Threonic acid-1,4-lactone       | 45.0  | 11.0      | 0.14   | 0.19      | 0.01  | 0.02      | 1.18 | 0.00   | 0.00   | -0.44               |
| 9-(Z)-Octadecenoic acid         | 117.0 | 19.9      | 0.48   | 0.62      | 0.02  | 0.07      | 1.16 | 0.00   | 0.00   | -0.39               |
| Eicosanoic acid                 | 117.0 | 21.8      | 0.10   | 0.12      | 0.01  | 0.01      | 1.07 | 0.00   | 0.01   | -0.32               |
| Glucaric acid                   | 333.1 | 18.4      | 0.21   | 0.25      | 0.01  | 0.02      | 1.18 | 0.00   | 0.00   | -0.24               |
| Lysine                          | 174.1 | 17.3      | 32.70  | 36.99     | 2.16  | 1.83      | 1.09 | 0.00   | 0.01   | -0.18               |
| Alanine                         | 116.1 | 7.0       | 63.50  | 51.46     | 3.51  | 2.63      | 1.33 | 0.00   | 0.00   | 0.30                |
| 2-Aminobutyric acid             | 130.1 | 8.1       | 0.97   | 0.75      | 0.11  | 0.07      | 1.17 | 0.00   | 0.00   | 0.37                |
| Serine                          | 204.2 | 10.8      | 123.92 | 90.75     | 5.57  | 11.80     | 1.25 | 0.00   | 0.00   | 0.45                |
| Methylmalonic acid              | 117.0 | 3.2       | 151.91 | 109.23    | 22.35 | 17.02     | 1.10 | 0.00   | 0.00   | 0.48                |
| 3-Hydroxypropanoic acid         | 177.1 | 7.6       | 0.19   | 0.13      | 0.02  | 0.01      | 1.39 | 0.00   | 0.00   | 0.55                |
| Monomethylphosphate             | 241.0 | 8.2       | 0.12   | 0.08      | 0.01  | 0.01      | 1.23 | 0.00   | 0.00   | 0.56                |
| Glycolic acid                   | 66.0  | 6.6       | 0.05   | 0.03      | 0.01  | 0.01      | 1.09 | 0.00   | 0.00   | 0.56                |
| Leucine                         | 158.1 | 9.6       | 63.66  | 41.99     | 3.16  | 3.87      | 1.40 | 0.00   | 0.00   | 0.60                |
| Pantothenic acid                | 103.1 | 18.0      | 2.19   | 1.44      | 0.10  | 0.19      | 1.34 | 0.00   | 0.00   | 0.61                |
| Citric acid                     | 191.0 | 2.5       | 180.79 | 117.94    | 20.91 | 20.53     | 1.23 | 0.00   | 0.00   | 0.62                |
| Valine                          | 144.1 | 8.8       | 70.88  | 46.03     | 3.66  | 5.29      | 1.38 | 0.00   | 0.00   | 0.62                |
| Azelaic acid                    | 55.1  | 15.9      | 0.05   | 0.03      | 0.01  | 0.01      | 1.16 | 0.00   | 0.00   | 0.69                |
| Homoserine                      | 103.0 | 10.7      | 0.03   | 0.02      | 0.00  | 0.01      | 1.08 | 0.00   | 0.01   | 0.74                |
| Isoleucine                      | 158.1 | 9.9       | 39.97  | 22.52     | 2.28  | 2.21      | 1.44 | 0.00   | 0.00   | 0.83                |
| Proline                         | 142.1 | 9.9       | 48.88  | 26.61     | 2.89  | 2.05      | 1.45 | 0.00   | 0.00   | 0.88                |
| Phenylalanine                   | 192.1 | 14.1      | 14.34  | 7.72      | 0.59  | 1.10      | 1.42 | 0.00   | 0.00   | 0.89                |
| Leucine amide                   | 131.1 | 3.0       | 0.38   | 0.19      | 0.06  | 0.06      | 1.25 | 0.00   | 0.00   | 0.99                |
| Threonic acid                   | 135.0 | 1.3       | 1.44   | 0.61      | 0.27  | 0.13      | 1.35 | 0.00   | 0.00   | 1.24                |
| Stachydrine                     | 144.1 | 1.4       | 4.14   | 1.72      | 0.51  | 0.56      | 1.34 | 0.00   | 0.00   | 1.26                |
| 4-Aminobutyric acid             | 175.1 | 13.0      | 0.77   | 0.32      | 0.04  | 0.07      | 1.43 | 0.00   | 0.00   | 1.28                |
| 9,12-(Z,Z)-Octadecadienoic acid | 81.1  | 19.9      | 0.20   | 0.08      | 0.11  | 0.03      | 1.01 | 0.00   | 0.02   | 1.31                |
| Threitol                        | 217.1 | 12.8      | 0.28   | 0.11      | 0.02  | 0.04      | 1.35 | 0.00   | 0.00   | 1.40                |
| Arginine                        | 173.1 | 1.2       | 0.58   | 0.22      | 0.12  | 0.04      | 1.38 | 0.00   | 0.00   | 1.40                |
| Urea                            | 189.1 | 9.0       | 37.30  | 14.13     | 1.35  | 1.08      | 1.48 | 0.00   | 0.00   | 1.40                |
| Hexonic acid                    | 217.1 | 18.2      | 0.47   | 0.17      | 0.03  | 0.02      | 1.47 | 0.00   | 0.00   | 1.43                |
| N-Acetylornithine               | 175.1 | 1.4       | 19.59  | 5.64      | 2.07  | 1.09      | 1.45 | 0.00   | 0.00   | 1.80                |
| Uric acid                       | 167.0 | 2.4       | 3.72   | 0.70      | 0.85  | 0.45      | 1.38 | 0.00   | 0.00   | 2.41                |
| Isomaltose                      | 361.2 | 25.6      | 0.47   | 0.06      | 0.08  | 0.03      | 1.44 | 0.00   | 0.00   | 2.88                |
| 2-Keto-L-gluconic acid          | 292.1 | 15.9      | 0.60   | 0.04      | 0.04  | 0.04      | 1.47 | 0.00   | 0.00   | 4.04                |
| alpha-Aspartylphenylalanine     | 281.1 | 5.9       | 2.91   | 0.12      | 0.33  | 0.04      | 1.47 | 0.00   | 0.00   | 4.66                |
| Methionine sulfoxide            | 166.1 | 1.3       | 8.03   | 0.28      | 0.60  | 0.05      | 1.48 | 0.00   | 0.00   | 4.85                |

**Table S2 Metabolites in hemolymph of female silkworm larvae examined by LC/GC-MS.** RI, retention index. Mz, quantitative ion of metabolites. Rt (mins), retention time (minutes). Mean, Repeat measurement of

biological samples are averaged. S.D., standard variance. pvalue, *t*-test significance. qvalue, Also known as false discovery rate (FDR), Which is false-positive correction of *t*-test significance. log<sub>2</sub>FC, logarithm of (HiM♀+LoM♀) /HiA♀ fold change (log<sub>2</sub>FC >0 means (HiM♀+LoM♀) < HiA; log<sub>2</sub>FC <0 means (HiM♀+LoM♀) >HiA). VIP, Partial least squares discrimination analysis (PLS-DA) first principal component variable importance in projection.

| Metabolites                 | mz    | Rt (mins) | mean   |           | S.D. |           | VIP  | pvalue | qvalue | log <sub>2</sub> FC |
|-----------------------------|-------|-----------|--------|-----------|------|-----------|------|--------|--------|---------------------|
|                             |       |           | HiA♂   | HiM♂+LoM♂ | HiA♂ | HiM♂+LoM♂ |      |        |        |                     |
| Thiamine                    | 265.1 | 1.3       | 0.12   | 2.94      | 0.04 | 0.43      | 1.53 | 0.00   | 0.00   | -4.65               |
| Biotin                      | 245.1 | 7.0       | 0.06   | 0.56      | 0.01 | 0.11      | 1.48 | 0.00   | 0.00   | -3.34               |
| Pipecolic acid              | 156.1 | 10.8      | 0.88   | 6.55      | 0.21 | 1.33      | 1.47 | 0.00   | 0.00   | -2.90               |
| alpha-Tocopherol            | 237.1 | 27.3      | 0.09   | 0.32      | 0.02 | 0.10      | 1.29 | 0.00   | 0.00   | -1.89               |
| Quinic acid                 | 345.3 | 16.8      | 70.60  | 235.68    | 7.21 | 27.47     | 1.52 | 0.00   | 0.00   | -1.74               |
| Cholesterol                 | 129.1 | 27.5      | 0.37   | 1.23      | 0.08 | 0.23      | 1.43 | 0.00   | 0.00   | -1.72               |
| Riboflavin                  | 377.1 | 6.8       | 0.69   | 2.12      | 0.06 | 0.46      | 1.38 | 0.00   | 0.00   | -1.63               |
| N6,N6,N6-Trimethyl-L-lysine | 189.2 | 1.2       | 38.66  | 97.25     | 4.51 | 15.89     | 1.43 | 0.00   | 0.00   | -1.33               |
| 2-Methyl-1,3-butanediol     | 117.0 | 11.0      | 0.09   | 0.22      | 0.01 | 0.02      | 1.52 | 0.00   | 0.00   | -1.30               |
| Fructose                    | 103.1 | 17.0      | 2.86   | 6.47      | 0.38 | 0.97      | 1.43 | 0.00   | 0.00   | -1.18               |
| Methionine                  | 176.1 | 12.8      | 3.17   | 6.72      | 0.21 | 0.70      | 1.50 | 0.00   | 0.00   | -1.08               |
| Arabitol                    | 217.1 | 15.2      | 0.65   | 1.20      | 0.07 | 0.18      | 1.37 | 0.00   | 0.00   | -0.87               |
| Glucose                     | 103.0 | 17.3      | 0.50   | 0.80      | 0.07 | 0.15      | 1.17 | 0.00   | 0.00   | -0.67               |
| Glycerol-3-phosphate        | 299.1 | 15.7      | 5.23   | 8.26      | 0.46 | 1.22      | 1.29 | 0.00   | 0.00   | -0.66               |
| Glycerol                    | 205.1 | 9.6       | 0.82   | 1.30      | 0.09 | 0.14      | 1.39 | 0.00   | 0.00   | -0.66               |
| Glycine                     | 174.1 | 10.1      | 46.73  | 73.86     | 4.80 | 12.85     | 1.21 | 0.00   | 0.00   | -0.66               |
| 4-Hydroxybenzoic acid       | 223.1 | 14.1      | 0.02   | 0.03      | 0.00 | 0.01      | 1.05 | 0.00   | 0.04   | -0.62               |
| Threonic acid-1,4-lactone   | 45.0  | 11.0      | 0.16   | 0.22      | 0.01 | 0.02      | 1.39 | 0.00   | 0.00   | -0.50               |
| Shikimic acid               | 204.1 | 16.2      | 0.41   | 0.55      | 0.03 | 0.08      | 1.12 | 0.00   | 0.01   | -0.42               |
| Fumaric acid                | 245.1 | 10.5      | 10.10  | 13.07     | 0.80 | 1.44      | 1.18 | 0.00   | 0.00   | -0.37               |
| Ethanolamine                | 174.1 | 9.5       | 0.92   | 1.17      | 0.03 | 0.14      | 1.14 | 0.00   | 0.01   | -0.35               |
| Lysine                      | 174.1 | 17.3      | 28.91  | 35.91     | 3.01 | 2.46      | 1.25 | 0.00   | 0.00   | -0.31               |
| Glucaric acid               | 333.1 | 18.4      | 0.23   | 0.27      | 0.01 | 0.02      | 1.06 | 0.00   | 0.04   | -0.22               |
| Choline                     | 104.1 | 1.2       | 80.51  | 63.07     | 6.44 | 10.20     | 1.07 | 0.00   | 0.04   | 0.35                |
| Phenylalanine               | 192.1 | 14.1      | 10.71  | 8.25      | 0.86 | 1.13      | 1.18 | 0.00   | 0.00   | 0.38                |
| Alanine                     | 116.1 | 7.0       | 76.32  | 58.75     | 5.04 | 5.21      | 1.36 | 0.00   | 0.00   | 0.38                |
| Adipic acid                 | 111.0 | 12.6      | 0.22   | 0.16      | 0.03 | 0.02      | 1.29 | 0.00   | 0.00   | 0.46                |
| Monomethylphosphate         | 241.0 | 8.2       | 0.12   | 0.08      | 0.02 | 0.01      | 1.14 | 0.00   | 0.01   | 0.48                |
| 2-Ketoglutaric acid         | 198.0 | 13.5      | 1.52   | 0.98      | 0.32 | 0.15      | 1.23 | 0.00   | 0.00   | 0.63                |
| Glutamic acid               | 246.1 | 14.0      | 2.12   | 1.35      | 0.28 | 0.24      | 1.32 | 0.00   | 0.00   | 0.66                |
| Proline                     | 142.1 | 9.9       | 50.98  | 31.83     | 2.23 | 3.39      | 1.51 | 0.00   | 0.00   | 0.68                |
| 2-Aminobutyric acid         | 130.1 | 8.1       | 2.83   | 1.73      | 0.47 | 0.55      | 1.12 | 0.00   | 0.01   | 0.71                |
| myo-Inositol                | 217.1 | 19.1      | 7.08   | 4.29      | 1.24 | 1.11      | 1.21 | 0.00   | 0.00   | 0.72                |
| Pantothenic acid            | 103.1 | 18.0      | 2.38   | 1.43      | 0.24 | 0.12      | 1.50 | 0.00   | 0.00   | 0.74                |
| 9-(Z)-Octadecenoic acid     | 117.0 | 19.9      | 1.35   | 0.78      | 0.23 | 0.30      | 1.11 | 0.00   | 0.02   | 0.79                |
| Mannose-6-phosphate         | 387.2 | 21.1      | 1.06   | 0.59      | 0.16 | 0.11      | 1.40 | 0.00   | 0.00   | 0.85                |
| Dodecanoic acid             | 117.0 | 14.3      | 0.11   | 0.06      | 0.02 | 0.01      | 1.36 | 0.00   | 0.00   | 0.89                |
| Fructose-6-phosphate        | 315.1 | 21.1      | 2.41   | 1.30      | 0.35 | 0.25      | 1.41 | 0.00   | 0.00   | 0.89                |
| Homoserine                  | 103.0 | 10.7      | 0.04   | 0.02      | 0.01 | 0.01      | 1.22 | 0.00   | 0.00   | 0.93                |
| Serine                      | 204.2 | 10.8      | 125.06 | 65.48     | 8.44 | 11.10     | 1.49 | 0.00   | 0.00   | 0.93                |
| Azelaic acid                | 55.1  | 15.9      | 0.11   | 0.05      | 0.02 | 0.01      | 1.34 | 0.00   | 0.00   | 1.04                |
| Threonic acid               | 135.0 | 1.3       | 1.63   | 0.72      | 0.86 | 0.23      | 1.05 | 0.00   | 0.04   | 1.19                |



|                                 |       |      |       |       |      |      |      |      |      |      |
|---------------------------------|-------|------|-------|-------|------|------|------|------|------|------|
| Glucose-6-phosphate             | 387.2 | 21.2 | 1.14  | 0.48  | 0.11 | 0.07 | 1.54 | 0.00 | 0.00 | 1.25 |
| Urea                            | 189.1 | 9.0  | 44.97 | 18.66 | 2.83 | 2.00 | 1.56 | 0.00 | 0.00 | 1.27 |
| Hexonic acid                    | 217.1 | 18.2 | 0.49  | 0.19  | 0.04 | 0.02 | 1.55 | 0.00 | 0.00 | 1.33 |
| Uric acid                       | 167.0 | 2.4  | 5.28  | 2.04  | 1.11 | 1.56 | 1.16 | 0.00 | 0.01 | 1.37 |
| 4-Aminobutyric acid             | 175.1 | 13.0 | 0.87  | 0.33  | 0.13 | 0.04 | 1.52 | 0.00 | 0.00 | 1.39 |
| Threitol                        | 217.1 | 12.8 | 0.30  | 0.11  | 0.04 | 0.05 | 1.43 | 0.00 | 0.00 | 1.41 |
| Stachydrine                     | 144.1 | 1.4  | 5.71  | 1.51  | 0.33 | 0.53 | 1.54 | 0.00 | 0.00 | 1.92 |
| 9,12-(Z,Z)-Octadecadienoic acid | 81.1  | 19.9 | 0.59  | 0.15  | 0.14 | 0.16 | 1.29 | 0.00 | 0.00 | 1.99 |
| Leucine amide                   | 131.1 | 3.0  | 0.55  | 0.13  | 0.07 | 0.05 | 1.53 | 0.00 | 0.00 | 2.05 |
| N-Acetylornithine               | 175.1 | 1.4  | 26.68 | 5.14  | 1.89 | 0.84 | 1.58 | 0.00 | 0.00 | 2.38 |
| Isomaltose                      | 361.2 | 25.6 | 0.37  | 0.04  | 0.07 | 0.02 | 1.54 | 0.00 | 0.00 | 3.15 |
| Ribonic acid                    | 333.2 | 15.8 | 1.28  | 0.04  | 0.08 | 0.02 | 1.58 | 0.00 | 0.00 | 4.92 |
| alpha-Aspartylphenylalanine     | 281.1 | 5.9  | 3.93  | 0.12  | 0.39 | 0.03 | 1.58 | 0.00 | 0.00 | 5.02 |
| Methionine sulfoxide            | 166.1 | 1.3  | 9.65  | 0.24  | 1.15 | 0.04 | 1.57 | 0.00 | 0.00 | 5.31 |
| 2-Keto-L-gluconic acid          | 292.1 | 15.9 | 0.59  | 0.01  | 0.10 | 0.02 | 1.56 | 0.00 | 0.00 | 5.46 |

**Table S3 Metabolites in hemolymph of male silkworm larvae examined by LC/GC-MS.** RI, retention index. Mz, quantitative ion of metabolites. Rt (mins), retention time (minutes). Mean, Repeat measurement of biological samples are averaged. S.D., standard variance. pvalue, *t*-test significance. qvalue, Also known as false discovery rate (FDR), Which is false-positive correction of *t*-test significance. log<sub>2</sub>FC, logarithm of (HiM♂+LoM♂) /HiA♂ fold change (log<sub>2</sub>FC >0 means (HiM♂+LoM♂) < HiA; log<sub>2</sub>FC <0 means (HiM♂+LoM♂) >HiA). VIP, Partial least squares discrimination analysis (PLS-DA) first principal component variable importance in projection.

| Metabolites            | Mean  |       |       | HiM♀ / HiA♀ |        |                     | LoM♀ / HiA♀ |        |                     |
|------------------------|-------|-------|-------|-------------|--------|---------------------|-------------|--------|---------------------|
|                        | HiM♀  | LoM♀  | HiA♀  | VIP         | pvalue | log <sub>2</sub> FC | VIP         | pvalue | log <sub>2</sub> FC |
| beta-Alanine           | 1.35  | 4.21  | 1.83  | 1.16        | 0.00   | -0.45               | 1.25        | 0.00   | 1.20                |
| Threonine              | 21.47 | 28.56 | 22.32 | 0.24        | 0.52   | -0.06               | 1.09        | 0.00   | 0.36                |
| Tryptophan             | 39.09 | 52.86 | 49.10 | 1.07        | 0.00   | -0.33               | 0.44        | 0.22   | 0.11                |
| 3-Aminoisobutyric acid | 0.80  | 0.00  | 0.15  | 1.24        | 0.00   | 2.44                | 1.20        | 0.00   | -∞                  |
| Glutamine              | 2.98  | 0.04  | 0.85  | 1.19        | 0.00   | 1.81                | 1.22        | 0.00   | -4.39               |
| Pyruvic acid           | 6.22  | 3.53  | 3.84  | 1.18        | 0.00   | 0.70                | 0.58        | 0.10   | -0.12               |
| Benzoic acid           | 0.02  | 0.01  | 0.01  | 1.13        | 0.00   | 0.65                | 0.26        | 0.47   | -0.17               |

**Table S4 Differences in the metabolites between the female silkworm larvae reared on fresh mulberry leaves and on artificial diet.** Mean, Repeat measurement of biological samples are averaged.. pvalue, *t*-test significance. log<sub>2</sub>FC, logarithm of (HiM♀ or LoM♀) /HiA♀ fold change. VIP, Partial least squares discrimination analysis (PLS-DA) first principal component variable importance in projection.

| Metabolites                | Mean   |       |        | HiA♂ / HiM♂ |        |                     | HiA♂ / LoM♂ |        |                     |
|----------------------------|--------|-------|--------|-------------|--------|---------------------|-------------|--------|---------------------|
|                            | HiA♂   | HiM♂  | LoM♂   | VIP         | pvalue | log <sub>2</sub> FC | VIP         | pvalue | log <sub>2</sub> FC |
| 3-Aminoisobutyric acid     | 0.13   | 1.14  | 0.00   | 1.36        | 0.00   | -3.19               | 0.88        | 0.01   | 6.29                |
| Glutamine                  | 0.56   | 2.53  | 0.12   | 1.28        | 0.00   | -2.16               | 0.96        | 0.00   | 2.18                |
| Urocanic acid              | 0.20   | 0.30  | 0.11   | 1.02        | 0.00   | -0.61               | 0.88        | 0.01   | 0.83                |
| Pyruvic acid               | 5.42   | 7.95  | 4.15   | 1.18        | 0.00   | -0.55               | 1.21        | 0.00   | 0.39                |
| N,N-Diphenylthiourea       | 0.15   | 0.15  | 0.09   | 0.09        | 0.82   | -0.02               | 1.10        | 0.00   | 0.80                |
| Sorbitol-6-phosphate       | 1.23   | 1.51  | 1.04   | 1.07        | 0.00   | -0.29               | 0.76        | 0.03   | 0.24                |
| 2-Amino-1,3-octadecanediol | 2.25   | 2.27  | 1.29   | 0.03        | 0.95   | -0.01               | 1.13        | 0.00   | 0.80                |
| beta-Alanine               | 2.50   | 1.64  | 5.48   | 1.31        | 0.00   | 0.60                | 1.29        | 0.00   | -1.13               |
| 2-Hydroxyglutaric acid     | 0.41   | 0.28  | 0.49   | 1.27        | 0.00   | 0.54                | 0.89        | 0.01   | -0.27               |
| 3-Hydroxypropanoic acid    | 0.31   | 0.24  | 0.43   | 1.01        | 0.00   | 0.40                | 1.02        | 0.00   | -0.45               |
| Methylmalonic acid         | 110.44 | 74.22 | 152.85 | 1.23        | 0.00   | 0.57                | 0.97        | 0.00   | -0.47               |
| 2-Oxoglutaric acid         | 30.24  | 14.54 | 39.46  | 1.25        | 0.00   | 1.06                | 0.60        | 0.10   | -0.38               |
| Citric acid                | 125.11 | 85.52 | 141.91 | 1.17        | 0.00   | 0.55                | 0.47        | 0.22   | -0.18               |
| Asparagine                 | 30.92  | 30.10 | 47.44  | 0.18        | 0.66   | 0.04                | 1.12        | 0.00   | -0.62               |

**Table S5 Differences in the metabolites between the male silkworm larvae reared on fresh mulberry leaves and on artificial diet.** Mean, Repeat measurement of biological samples are averaged.. pvalue, *t*-test significance. log<sub>2</sub>FC, logarithm of (HiM♂ or LoM♂) /HiA♂ fold change. VIP, Partial least squares discrimination analysis (PLS-DA) first principal component variable importance in projection.

| Year              | 0              | 1              | 2              | 3              | 4              | 5               | 6               | 7               |
|-------------------|----------------|----------------|----------------|----------------|----------------|-----------------|-----------------|-----------------|
| Select generation | S <sub>0</sub> | S <sub>2</sub> | S <sub>4</sub> | S <sub>6</sub> | S <sub>8</sub> | S <sub>10</sub> | S <sub>12</sub> | S <sub>14</sub> |
| PST of Hi (%)     | 48.2           | 69.1           | 82.7           | 89.5           | 93.9           | 96.6            | 100             | 100             |
| PST of Lo (%)     | 48.2           | 40.4           | 31.9           | 26.7           | 17.4           | 9.2             | 2.3             | 0.80            |

**Table S6 Effect of disruptive selection on the ingestive behavior of Jingsong B silkworm varieties to artificial diet.** S<sub>0</sub>, the generation of mother strain. S<sub>2</sub>-S<sub>14</sub>, the second to the 14<sup>th</sup> select generation. The starting material was a domesticated silkworm variety, *B. mori* Jingsong B (Chinese system). Using a combination of batch selection and individual selection, a continuous, we conducted a multi-generational disruptive selection of the ingestive behavior of silkworm larvae to an artificial diet. We judged feeding performance by the percentage of setae dispersion after feeding 48h (PST). The body of newly-hatched silkworm larvae is black. The body would light in color after normal eating mulberry leaf or artificial diet more than 48 hours, meantime the bulged setae tubercle on cuticle would flattened. If the larvae can't eat normally, they will retarded growth and the bulged setae tubercle on cuticle cannot be flattened. After 7 years of continuous selection of 14 generations, we obtained two strains, one of which almost 100% of the larvae ingested the artificial diet, while the other almost 100% of the larvae did not ingested the artificial diet and starved to death during their newly hatched larval stage. They are named as high ingestive habit stain and lower ingestive habit stain, and abbreviated to Hi and Lo in this study, respectively. The data repeat 10 groups.
